# Supplementary material for: Genotypic Diversity ofMycobacterium tuberculosisClinical Isolates in the Multiethnic Area of the Xinjiang Uygur Autonomous Region in China
Source: Hindawi journal article supplement (doi:10.1155/2017/3179535), 2017-01-01
Supplement: f1 [file 3179535.f1.pdf]

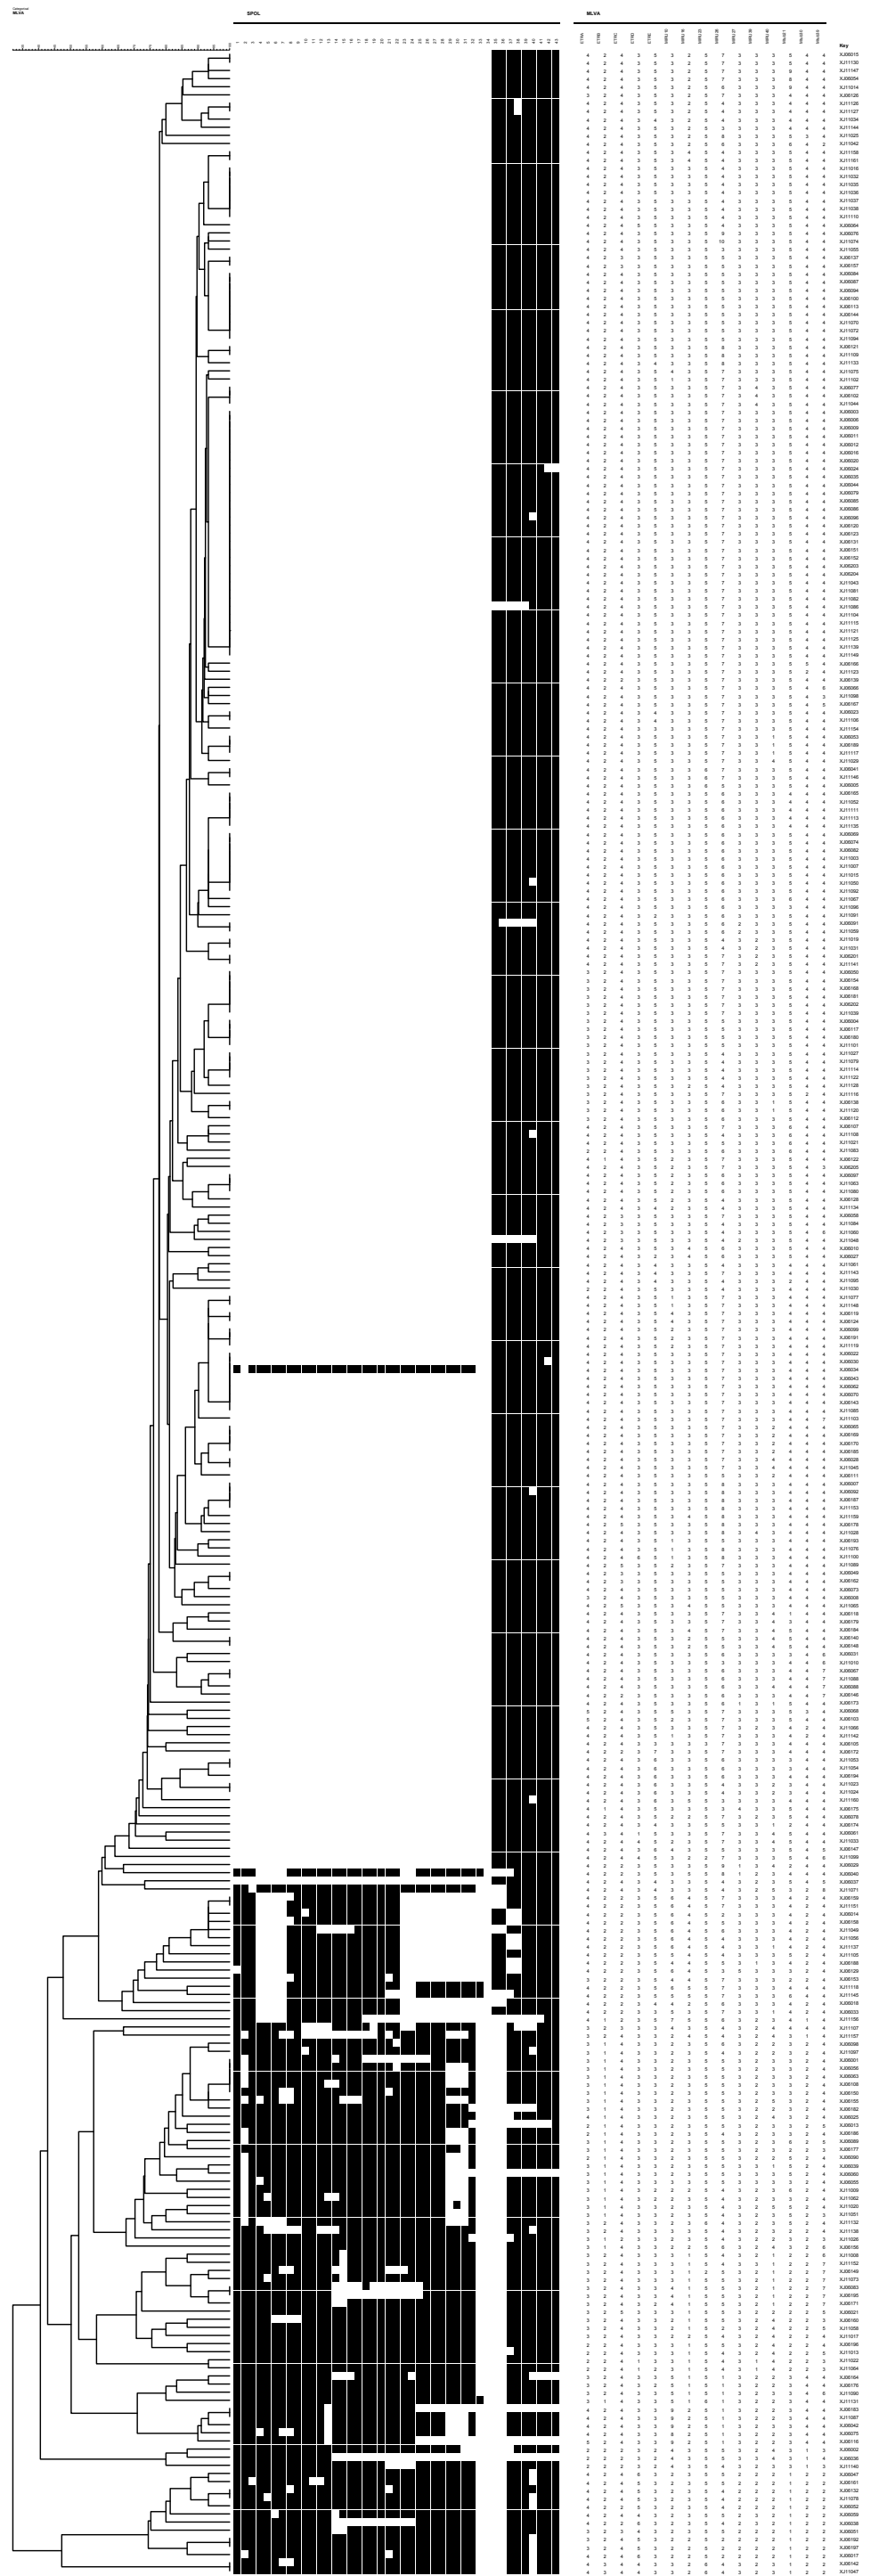

# Figure S1









|         |   |   |   |   |   |   |   |   |   |
|---------|---|---|---|---|---|---|---|---|---|
| XJ11023 | 0 | 0 | 0 | 0 | 0 | 0 | 0 | 0 | 0 |
| XJ11024 | 0 | 0 | 0 | 0 | 0 | 0 | 0 | 0 | 0 |
| XJ11025 | 0 | 0 | 0 | 0 | 0 | 0 | 0 | 0 | 0 |
| XJ11026 | 1 | 1 | 1 | 1 | 1 | 1 | 1 | 1 | 1 |
| XJ11027 | 0 | 0 | 0 | 0 | 0 | 0 | 0 | 0 | 0 |
| XJ11028 | 0 | 0 | 0 | 0 | 0 | 0 | 0 | 0 | 0 |
| XJ11029 | 0 | 0 | 0 | 0 | 0 | 0 | 0 | 0 | 0 |
| XJ11030 | 0 | 0 | 0 | 0 | 0 | 0 | 0 | 0 | 0 |
| XJ11031 | 0 | 0 | 0 | 0 | 0 | 0 | 0 | 0 | 0 |
| XJ11032 | 0 | 0 | 0 | 0 | 0 | 0 | 0 | 0 | 0 |
| XJ11033 | 0 | 0 | 0 | 0 | 0 | 0 | 0 | 0 | 0 |
| XJ11034 | 0 | 0 | 0 | 0 | 0 | 0 | 0 | 0 | 0 |
| XJ11035 | 0 | 0 | 0 | 0 | 0 | 0 | 0 | 0 | 0 |
| XJ11036 | 0 | 0 | 0 | 0 | 0 | 0 | 0 | 0 | 0 |
| XJ11037 | 0 | 0 | 0 | 0 | 0 | 0 | 0 | 0 | 0 |
| XJ11038 | 0 | 0 | 0 | 0 | 0 | 0 | 0 | 0 | 0 |
| XJ11039 | 0 | 0 | 0 | 0 | 0 | 0 | 0 | 0 | 0 |
| XJ11042 | 0 | 0 | 0 | 0 | 0 | 0 | 0 | 0 | 0 |
| XJ11043 | 0 | 0 | 0 | 0 | 0 | 0 | 0 | 0 | 0 |
| XJ11044 | 0 | 0 | 0 | 0 | 0 | 0 | 0 | 0 | 0 |
| XJ11045 | 0 | 0 | 0 | 0 | 0 | 0 | 0 | 0 | 0 |
| XJ11047 | 1 | 1 | 1 | 1 | 1 | 1 | 1 | 1 | 1 |
| XJ11048 | 0 | 0 | 0 | 0 | 0 | 0 | 0 | 0 | 0 |
| XJ11049 | 1 | 1 | 1 | 0 | 0 | 0 | 0 | 1 | 1 |
| XJ11050 | 0 | 0 | 0 | 0 | 0 | 0 | 0 | 0 | 0 |
| XJ11051 | 1 | 0 | 1 | 1 | 1 | 1 | 1 | 1 | 1 |
| XJ11052 | 0 | 0 | 0 | 0 | 0 | 0 | 0 | 0 | 0 |
| XJ11053 | 0 | 0 | 0 | 0 | 0 | 0 | 0 | 0 | 0 |
| XJ11054 | 0 | 0 | 0 | 0 | 0 | 0 | 0 | 0 | 0 |
| XJ11055 | 0 | 0 | 0 | 0 | 0 | 0 | 0 | 0 | 0 |
| XJ11056 | 1 | 1 | 1 | 0 | 0 | 0 | 0 | 1 | 1 |
| XJ11058 | 1 | 1 | 1 | 1 | 1 | 1 | 1 | 1 | 1 |
| XJ11059 | 0 | 0 | 0 | 0 | 0 | 0 | 0 | 0 | 0 |
| XJ11060 | 0 | 0 | 0 | 0 | 0 | 0 | 0 | 0 | 0 |
| XJ11061 | 0 | 0 | 0 | 0 | 0 | 0 | 0 | 0 | 0 |
| XJ11062 | 1 | 0 | 1 | 1 | 0 | 1 | 1 | 1 | 1 |
| XJ11063 | 0 | 0 | 0 | 0 | 0 | 0 | 0 | 0 | 0 |
| XJ11064 | 1 | 1 | 1 | 1 | 1 | 1 | 1 | 1 | 1 |
| XJ11065 | 0 | 0 | 0 | 0 | 0 | 0 | 0 | 0 | 0 |
| XJ11066 | 0 | 0 | 0 | 0 | 0 | 0 | 0 | 0 | 0 |
| XJ11067 | 0 | 0 | 0 | 0 | 0 | 0 | 0 | 0 | 0 |
| XJ11070 | 0 | 0 | 0 | 0 | 0 | 0 | 0 | 0 | 0 |
| XJ11071 | 1 | 1 | 0 | 1 | 1 | 1 | 1 | 1 | 1 |
| XJ11072 | 0 | 0 | 0 | 0 | 0 | 0 | 0 | 0 | 0 |
| XJ11073 | 1 | 1 | 1 | 1 | 0 | 1 | 1 | 1 | 1 |
| XJ11074 | 0 | 0 | 0 | 0 | 0 | 0 | 0 | 0 | 0 |
| XJ11075 | 0 | 0 | 0 | 0 | 0 | 0 | 0 | 0 | 0 |
| XJ11076 | 0 | 0 | 0 | 0 | 0 | 0 | 0 | 0 | 0 |
| XJ11077 | 0 | 0 | 0 | 0 | 0 | 0 | 0 | 0 | 0 |
| XJ11078 | 1 | 1 | 1 | 1 | 0 | 1 | 1 | 1 | 1 |

|         |   |   |   |   |   |   |   |   |   |
|---------|---|---|---|---|---|---|---|---|---|
| XJ11079 | 0 | 0 | 0 | 0 | 0 | 0 | 0 | 0 | 0 |
| XJ11080 | 0 | 0 | 0 | 0 | 0 | 0 | 0 | 0 | 0 |
| XJ11081 | 0 | 0 | 0 | 0 | 0 | 0 | 0 | 0 | 0 |
| XJ11082 | 0 | 0 | 0 | 0 | 0 | 0 | 0 | 0 | 0 |
| XJ11083 | 0 | 0 | 0 | 0 | 0 | 0 | 0 | 0 | 0 |
| XJ11084 | 0 | 0 | 0 | 0 | 0 | 0 | 0 | 0 | 0 |
| XJ11085 | 0 | 0 | 0 | 0 | 0 | 0 | 0 | 0 | 0 |
| XJ11086 | 0 | 0 | 0 | 0 | 0 | 0 | 0 | 0 | 0 |
| XJ11087 | 1 | 1 | 1 | 1 | 1 | 1 | 1 | 1 | 1 |
| XJ11088 | 0 | 0 | 0 | 0 | 0 | 0 | 0 | 0 | 0 |
| XJ11089 | 0 | 0 | 0 | 0 | 0 | 0 | 0 | 0 | 0 |
| XJ11090 | 1 | 1 | 1 | 1 | 1 | 1 | 1 | 1 | 1 |
| XJ11091 | 0 | 0 | 0 | 0 | 0 | 0 | 0 | 0 | 0 |
| XJ11092 | 0 | 0 | 0 | 0 | 0 | 0 | 0 | 0 | 0 |
| XJ11094 | 0 | 0 | 0 | 0 | 0 | 0 | 0 | 0 | 0 |
| XJ11095 | 0 | 0 | 0 | 0 | 0 | 0 | 0 | 0 | 0 |
| XJ11096 | 0 | 0 | 0 | 0 | 0 | 0 | 0 | 0 | 0 |
| XJ11097 | 1 | 1 | 1 | 1 | 1 | 1 | 1 | 1 | 1 |
| XJ11098 | 0 | 0 | 0 | 0 | 0 | 0 | 0 | 0 | 0 |
| XJ11099 | 0 | 0 | 0 | 0 | 0 | 0 | 0 | 0 | 0 |
| XJ11100 | 0 | 0 | 0 | 0 | 0 | 0 | 0 | 0 | 0 |
| XJ11101 | 0 | 0 | 0 | 0 | 0 | 0 | 0 | 0 | 0 |
| XJ11102 | 0 | 0 | 0 | 0 | 0 | 0 | 0 | 0 | 0 |
| XJ11103 | 0 | 0 | 0 | 0 | 0 | 0 | 0 | 0 | 0 |
| XJ11104 | 0 | 0 | 0 | 0 | 0 | 0 | 0 | 0 | 0 |
| XJ11105 | 1 | 1 | 1 | 0 | 0 | 0 | 0 | 1 | 1 |
| XJ11106 | 0 | 0 | 0 | 0 | 0 | 0 | 0 | 0 | 0 |
| XJ11107 | 1 | 1 | 1 | 1 | 1 | 1 | 1 | 1 | 1 |
| XJ11108 | 0 | 0 | 0 | 0 | 0 | 0 | 0 | 0 | 0 |
| XJ11109 | 0 | 0 | 0 | 0 | 0 | 0 | 0 | 0 | 0 |
| XJ11110 | 0 | 0 | 0 | 0 | 0 | 0 | 0 | 0 | 0 |
| XJ11111 | 0 | 0 | 0 | 0 | 0 | 0 | 0 | 0 | 0 |
| XJ11113 | 0 | 0 | 0 | 0 | 0 | 0 | 0 | 0 | 0 |
| XJ11114 | 0 | 0 | 0 | 0 | 0 | 0 | 0 | 0 | 0 |
| XJ11115 | 0 | 0 | 0 | 0 | 0 | 0 | 0 | 0 | 0 |
| XJ11116 | 0 | 0 | 0 | 0 | 0 | 0 | 0 | 0 | 0 |
| XJ11117 | 0 | 0 | 0 | 0 | 0 | 0 | 0 | 0 | 0 |
| XJ11118 | 1 | 1 | 1 | 0 | 0 | 0 | 0 | 1 | 1 |
| XJ11119 | 0 | 0 | 0 | 0 | 0 | 0 | 0 | 0 | 0 |
| XJ11120 | 0 | 0 | 0 | 0 | 0 | 0 | 0 | 0 | 0 |
| XJ11121 | 0 | 0 | 0 | 0 | 0 | 0 | 0 | 0 | 0 |
| XJ11122 | 0 | 0 | 0 | 0 | 0 | 0 | 0 | 0 | 0 |
| XJ11123 | 0 | 0 | 0 | 0 | 0 | 0 | 0 | 0 | 0 |
| XJ11125 | 0 | 0 | 0 | 0 | 0 | 0 | 0 | 0 | 0 |
| XJ11126 | 0 | 0 | 0 | 0 | 0 | 0 | 0 | 0 | 0 |
| XJ11127 | 0 | 0 | 0 | 0 | 0 | 0 | 0 | 0 | 0 |
| XJ11128 | 0 | 0 | 0 | 0 | 0 | 0 | 0 | 0 | 0 |
| XJ11130 | 0 | 0 | 0 | 0 | 0 | 0 | 0 | 0 | 0 |
| XJ11131 | 1 | 1 | 1 | 1 | 1 | 1 | 1 | 1 | 1 |
| XJ11132 | 1 | 0 | 1 | 0 | 0 | 0 | 0 | 1 | 1 |





[illegible]

[illegible]

[illegible]

[illegible]

[illegible]

[illegible]

[illegible]

[illegible]



[illegible]

[illegible]

[illegible]

[illegible]

[illegible]

[illegible]

| 30 | 31 | 32 | 33 | 34 | 35 | 36 | 37 | 38 | 39 |
|----|----|----|----|----|----|----|----|----|----|
| 1  | 1  | 1  | 0  | 0  | 0  | 0  | 1  | 1  | 1  |
| 1  | 1  | 1  | 1  | 1  | 1  | 1  | 1  | 1  | 0  |
| 0  | 0  | 0  | 0  | 0  | 0  | 0  | 0  | 0  | 0  |
| 1  | 1  | 1  | 0  | 0  | 0  | 0  | 1  | 1  | 1  |
| 1  | 0  | 0  | 0  | 0  | 0  | 0  | 0  | 1  | 1  |
| 0  | 0  | 0  | 0  | 0  | 1  | 1  | 1  | 1  | 1  |
| 0  | 0  | 0  | 0  | 0  | 1  | 1  | 1  | 1  | 1  |
| 0  | 0  | 0  | 0  | 0  | 1  | 1  | 1  | 1  | 1  |
| 0  | 0  | 0  | 0  | 0  | 1  | 1  | 1  | 1  | 1  |
| 0  | 0  | 0  | 0  | 0  | 1  | 1  | 1  | 1  | 1  |
| 0  | 0  | 0  | 0  | 0  | 1  | 1  | 1  | 1  | 1  |
| 0  | 0  | 0  | 0  | 0  | 1  | 1  | 1  | 1  | 1  |
| 0  | 0  | 0  | 0  | 0  | 1  | 1  | 1  | 1  | 1  |
| 0  | 0  | 0  | 0  | 0  | 1  | 1  | 1  | 1  | 1  |
| 1  | 1  | 0  | 0  | 0  | 0  | 0  | 0  | 0  | 0  |
| 0  | 0  | 0  | 0  | 0  | 1  | 1  | 0  | 0  | 1  |
| 0  | 0  | 0  | 0  | 0  | 1  | 1  | 1  | 1  | 1  |
| 0  | 0  | 0  | 0  | 0  | 1  | 1  | 1  | 1  | 1  |
| 1  | 1  | 1  | 0  | 0  | 0  | 0  | 1  | 1  | 1  |
| 0  | 0  | 0  | 0  | 0  | 0  | 0  | 1  | 1  | 1  |
| 0  | 0  | 0  | 0  | 0  | 1  | 1  | 1  | 1  | 1  |
| 1  | 1  | 1  | 0  | 0  | 0  | 0  | 1  | 1  | 1  |
| 0  | 0  | 0  | 0  | 0  | 1  | 1  | 1  | 1  | 1  |
| 0  | 0  | 0  | 0  | 0  | 1  | 1  | 1  | 1  | 1  |
| 0  | 0  | 0  | 0  | 0  | 1  | 1  | 1  | 1  | 1  |
| 1  | 1  | 1  | 0  | 0  | 0  | 0  | 0  | 1  | 1  |
| 0  | 0  | 0  | 0  | 0  | 1  | 1  | 1  | 1  | 1  |
| 0  | 0  | 0  | 0  | 0  | 1  | 1  | 1  | 1  | 1  |
| 0  | 0  | 0  | 0  | 0  | 1  | 1  | 1  | 1  | 1  |
| 1  | 1  | 1  | 0  | 0  | 1  | 1  | 1  | 1  | 1  |
| 0  | 0  | 0  | 0  | 0  | 1  | 1  | 1  | 1  | 1  |
| 0  | 0  | 0  | 0  | 0  | 1  | 1  | 1  | 1  | 1  |
| 0  | 0  | 0  | 0  | 0  | 1  | 1  | 1  | 1  | 1  |
| 1  | 1  | 1  | 0  | 0  | 1  | 1  | 1  | 1  | 1  |
| 0  | 0  | 0  | 0  | 0  | 1  | 1  | 1  | 1  | 1  |
| 0  | 0  | 0  | 0  | 0  | 1  | 1  | 1  | 1  | 1  |
| 0  | 0  | 0  | 0  | 0  | 1  | 1  | 1  | 1  | 1  |
| 1  | 1  | 1  | 0  | 0  | 1  | 1  | 1  | 1  | 1  |
| 0  | 0  | 0  | 0  | 0  | 1  | 1  | 1  | 1  | 1  |
| 0  | 0  | 0  | 0  | 0  | 1  | 1  | 1  | 1  | 1  |
| 0  | 0  | 0  | 0  | 0  | 1  | 1  | 1  | 1  | 1  |
| 1  | 1  | 1  | 0  | 0  | 1  | 1  | 1  | 1  | 1  |
| 0  | 0  | 0  | 0  | 0  | 1  | 1  | 1  | 1  | 1  |
| 0  | 0  | 0  | 0  | 0  | 1  | 1  | 1  | 1  | 1  |
| 1  | 1  | 1  | 0  | 0  | 0  | 0  | 1  | 1  | 1  |
| 0  | 0  | 1  | 0  | 0  | 0  | 0  | 1  | 1  | 1  |
| 1  | 1  | 1  | 1  | 0  | 0  | 0  | 0  | 1  | 1  |
| 0  | 0  | 0  | 0  | 0  | 1  | 1  | 1  | 1  | 1  |
| 0  | 0  | 1  | 0  | 0  | 0  | 0  | 1  | 1  | 1  |
| 0  | 0  | 0  | 0  | 0  | 1  | 1  | 1  | 1  | 1  |
| 0  | 0  | 0  | 0  | 0  | 1  | 1  | 1  | 1  | 1  |
| 1  | 1  | 1  | 0  | 0  | 0  | 0  | 1  | 1  | 1  |
| 0  | 0  | 0  | 0  | 0  | 1  | 1  | 1  | 1  | 1  |

[illegible]



|   |   |   |   |   |   |   |   |   |   |
|---|---|---|---|---|---|---|---|---|---|
| 0 | 0 | 0 | 0 | 0 | 1 | 1 | 1 | 1 | 1 |
| 0 | 0 | 1 | 0 | 0 | 0 | 0 | 1 | 1 | 1 |
| 0 | 0 | 0 | 0 | 0 | 1 | 1 | 1 | 1 | 1 |
| 0 | 0 | 0 | 0 | 0 | 1 | 1 | 1 | 1 | 1 |
| 0 | 0 | 0 | 0 | 0 | 1 | 1 | 1 | 1 | 1 |
| 0 | 0 | 0 | 0 | 0 | 0 | 0 | 0 | 0 | 0 |
| 0 | 0 | 0 | 0 | 0 | 1 | 1 | 1 | 1 | 1 |
| 0 | 0 | 0 | 0 | 0 | 1 | 1 | 1 | 1 | 1 |
| 0 | 0 | 0 | 0 | 0 | 1 | 1 | 1 | 1 | 1 |
| 0 | 0 | 0 | 0 | 0 | 1 | 1 | 1 | 1 | 1 |
| 0 | 0 | 0 | 0 | 0 | 1 | 1 | 1 | 1 | 1 |
| 0 | 0 | 0 | 0 | 0 | 1 | 1 | 1 | 1 | 1 |
| 0 | 0 | 0 | 0 | 0 | 1 | 1 | 1 | 1 | 1 |
| 0 | 0 | 0 | 0 | 0 | 1 | 1 | 1 | 1 | 1 |
| 0 | 0 | 0 | 0 | 0 | 1 | 1 | 1 | 1 | 1 |
| 0 | 0 | 0 | 0 | 0 | 1 | 1 | 0 | 0 | 1 |
| 0 | 0 | 0 | 0 | 0 | 1 | 1 | 1 | 1 | 1 |
| 1 | 1 | 1 | 0 | 0 | 0 | 0 | 1 | 1 | 1 |
| 0 | 0 | 0 | 0 | 0 | 1 | 1 | 1 | 1 | 1 |
| 0 | 0 | 0 | 0 | 0 | 1 | 1 | 1 | 1 | 1 |
| 0 | 0 | 0 | 0 | 0 | 1 | 1 | 1 | 1 | 1 |
| 0 | 0 | 0 | 0 | 0 | 1 | 1 | 1 | 1 | 1 |
| 1 | 1 | 1 | 0 | 0 | 0 | 0 | 1 | 1 | 1 |
| 0 | 0 | 0 | 0 | 0 | 1 | 1 | 1 | 1 | 1 |
| 0 | 0 | 0 | 0 | 0 | 1 | 1 | 1 | 1 | 1 |
| 0 | 0 | 0 | 0 | 0 | 1 | 1 | 1 | 1 | 1 |
| 0 | 0 | 0 | 0 | 0 | 1 | 1 | 1 | 1 | 1 |
| 1 | 1 | 1 | 0 | 0 | 0 | 0 | 1 | 1 | 1 |
| 1 | 1 | 1 | 0 | 0 | 0 | 0 | 1 | 1 | 1 |
| 0 | 0 | 0 | 0 | 0 | 1 | 1 | 1 | 1 | 1 |
| 0 | 0 | 0 | 0 | 0 | 1 | 1 | 1 | 1 | 1 |
| 0 | 0 | 0 | 0 | 0 | 1 | 1 | 1 | 1 | 1 |
| 0 | 0 | 0 | 0 | 0 | 1 | 1 | 1 | 1 | 1 |
| 0 | 0 | 1 | 0 | 0 | 0 | 0 | 1 | 1 | 1 |
| 1 | 1 | 1 | 0 | 0 | 0 | 0 | 1 | 1 | 1 |
| 0 | 0 | 0 | 0 | 0 | 1 | 1 | 1 | 1 | 1 |
| 0 | 0 | 0 | 0 | 0 | 1 | 1 | 0 | 0 | 1 |
| 0 | 0 | 0 | 0 | 0 | 0 | 0 | 1 | 1 | 1 |
| 1 | 1 | 1 | 0 | 0 | 0 | 0 | 1 | 1 | 1 |
| 1 | 1 | 1 | 0 | 0 | 0 | 0 | 1 | 1 | 1 |
| 0 | 0 | 0 | 0 | 0 | 1 | 1 | 1 | 1 | 1 |
| 1 | 1 | 1 | 0 | 0 | 0 | 0 | 1 | 1 | 1 |
| 0 | 0 | 0 | 0 | 0 | 1 | 1 | 1 | 1 | 1 |
| 0 | 0 | 0 | 0 | 0 | 1 | 1 | 1 | 1 | 1 |
| 0 | 0 | 0 | 0 | 0 | 1 | 1 | 1 | 1 | 1 |

|   |   |   |   |   |   |   |   |   |   |
|---|---|---|---|---|---|---|---|---|---|
| 0 | 0 | 0 | 0 | 0 | 1 | 1 | 1 | 1 | 1 |
| 0 | 0 | 0 | 0 | 0 | 1 | 1 | 1 | 1 | 1 |
| 0 | 0 | 0 | 0 | 0 | 1 | 1 | 1 | 1 | 1 |
| 1 | 1 | 1 | 0 | 0 | 0 | 0 | 1 | 1 | 1 |
| 0 | 0 | 0 | 0 | 0 | 1 | 1 | 1 | 1 | 1 |
| 0 | 0 | 0 | 0 | 0 | 1 | 1 | 1 | 1 | 1 |
| 0 | 0 | 0 | 0 | 0 | 1 | 1 | 1 | 1 | 1 |
| 0 | 0 | 0 | 0 | 0 | 1 | 1 | 1 | 1 | 1 |
| 1 | 1 | 1 | 0 | 0 | 0 | 0 | 1 | 1 | 1 |
| 1 | 0 | 1 | 0 | 0 | 0 | 0 | 1 | 1 | 1 |
| 0 | 0 | 0 | 0 | 0 | 1 | 1 | 1 | 1 | 1 |
| 0 | 0 | 0 | 0 | 0 | 1 | 1 | 1 | 1 | 1 |
| 0 | 0 | 0 | 0 | 0 | 1 | 1 | 1 | 1 | 1 |
| 0 | 0 | 0 | 0 | 0 | 1 | 1 | 1 | 1 | 1 |
| 1 | 1 | 0 | 0 | 0 | 0 | 0 | 0 | 0 | 0 |
| 0 | 0 | 0 | 0 | 0 | 0 | 0 | 0 | 0 | 0 |
| 0 | 0 | 0 | 0 | 0 | 1 | 1 | 1 | 1 | 1 |
| 0 | 0 | 0 | 0 | 0 | 1 | 1 | 1 | 1 | 1 |
| 0 | 0 | 1 | 0 | 0 | 0 | 0 | 1 | 1 | 1 |
| 0 | 0 | 0 | 0 | 0 | 1 | 1 | 1 | 1 | 1 |
| 0 | 0 | 0 | 0 | 0 | 1 | 1 | 0 | 0 | 1 |
| 0 | 0 | 0 | 0 | 0 | 1 | 1 | 1 | 1 | 1 |
| 0 | 0 | 0 | 0 | 0 | 1 | 1 | 1 | 1 | 1 |
| 1 | 1 | 1 | 0 | 0 | 0 | 0 | 1 | 1 | 1 |
| 0 | 0 | 0 | 0 | 0 | 1 | 1 | 1 | 1 | 1 |
| 0 | 0 | 0 | 0 | 0 | 1 | 1 | 1 | 1 | 1 |
| 1 | 1 | 1 | 0 | 0 | 0 | 0 | 1 | 1 | 1 |
| 1 | 1 | 1 | 0 | 0 | 0 | 0 | 1 | 1 | 1 |
| 1 | 1 | 1 | 0 | 0 | 0 | 0 | 1 | 1 | 1 |
| 0 | 0 | 0 | 0 | 0 | 1 | 1 | 1 | 1 | 1 |
| 0 | 0 | 0 | 0 | 0 | 1 | 1 | 1 | 1 | 1 |
| 0 | 0 | 0 | 0 | 0 | 1 | 1 | 1 | 1 | 1 |
| 0 | 0 | 0 | 0 | 0 | 1 | 1 | 1 | 1 | 1 |
| 0 | 0 | 0 | 0 | 0 | 1 | 1 | 1 | 1 | 1 |
| 0 | 0 | 0 | 0 | 0 | 1 | 1 | 1 | 1 | 1 |
| 0 | 0 | 0 | 0 | 0 | 1 | 1 | 1 | 1 | 1 |
| 1 | 1 | 1 | 0 | 0 | 0 | 0 | 1 | 1 | 1 |
| 0 | 0 | 1 | 0 | 0 | 0 | 0 | 1 | 1 | 1 |
| 0 | 0 | 0 | 0 | 0 | 1 | 1 | 1 | 1 | 1 |
| 1 | 1 | 1 | 0 | 0 | 0 | 0 | 1 | 1 | 1 |
| 0 | 0 | 0 | 0 | 0 | 1 | 1 | 1 | 1 | 1 |
| 0 | 0 | 0 | 0 | 0 | 1 | 1 | 1 | 1 | 1 |
| 0 | 0 | 0 | 0 | 0 | 1 | 1 | 1 | 1 | 1 |
| 0 | 0 | 0 | 0 | 0 | 1 | 1 | 1 | 1 | 1 |
| 0 | 0 | 0 | 0 | 0 | 1 | 1 | 1 | 1 | 1 |
| 1 | 1 | 1 | 0 | 0 | 0 | 0 | 1 | 1 | 1 |
| 0 | 0 | 0 | 0 | 0 | 1 | 1 | 1 | 1 | 1 |
| 0 | 0 | 0 | 0 | 0 | 1 | 1 | 1 | 1 | 1 |
| 0 | 0 | 0 | 0 | 0 | 1 | 1 | 1 | 1 | 1 |
| 1 | 1 | 1 | 0 | 0 | 0 | 0 | 1 | 1 | 1 |
| 0 | 0 | 0 | 0 | 0 | 1 | 1 | 1 | 1 | 1 |
| 1 | 0 | 1 | 0 | 0 | 0 | 0 | 1 | 1 | 1 |
| 0 | 0 | 0 | 0 | 0 | 1 | 1 | 1 | 1 | 1 |
| 1 | 1 | 1 | 0 | 0 | 0 | 0 | 1 | 1 | 1 |

[illegible]

[illegible]

|   |   |   |   |   |   |   |   |   |   |
|---|---|---|---|---|---|---|---|---|---|
| 0 | 0 | 0 | 0 | 0 | 1 | 1 | 1 | 1 | 1 |
| 0 | 0 | 0 | 0 | 0 | 1 | 1 | 1 | 1 | 1 |
| 0 | 0 | 0 | 0 | 0 | 1 | 1 | 1 | 1 | 1 |
| 0 | 0 | 0 | 0 | 0 | 1 | 1 | 0 | 0 | 1 |
| 1 | 1 | 1 | 0 | 0 | 0 | 0 | 1 | 1 | 1 |
| 0 | 0 | 0 | 0 | 0 | 1 | 1 | 1 | 1 | 1 |
| 1 | 1 | 1 | 0 | 0 | 0 | 0 | 1 | 1 | 1 |
| 0 | 0 | 0 | 0 | 0 | 1 | 1 | 1 | 1 | 1 |
| 0 | 0 | 0 | 0 | 0 | 1 | 1 | 1 | 1 | 1 |
| 0 | 0 | 0 | 0 | 0 | 1 | 1 | 1 | 1 | 1 |
| 0 | 0 | 0 | 0 | 0 | 1 | 1 | 1 | 1 | 1 |
| 1 | 1 | 1 | 1 | 0 | 0 | 0 | 0 | 1 | 1 |
| 0 | 0 | 0 | 0 | 0 | 1 | 1 | 1 | 1 | 1 |
| 0 | 0 | 0 | 0 | 0 | 1 | 1 | 1 | 1 | 1 |
| 0 | 0 | 0 | 0 | 0 | 1 | 1 | 1 | 1 | 1 |
| 0 | 0 | 0 | 0 | 0 | 1 | 1 | 1 | 1 | 1 |
| 0 | 0 | 0 | 0 | 0 | 0 | 0 | 1 | 1 | 1 |
| 1 | 1 | 1 | 0 | 0 | 0 | 0 | 1 | 1 | 1 |
| 0 | 0 | 0 | 0 | 0 | 1 | 1 | 1 | 1 | 1 |
| 0 | 0 | 0 | 0 | 0 | 1 | 1 | 1 | 1 | 1 |
| 0 | 0 | 0 | 0 | 0 | 0 | 0 | 0 | 0 | 0 |
| 0 | 0 | 1 | 0 | 0 | 0 | 0 | 1 | 1 | 1 |
| 0 | 0 | 0 | 0 | 0 | 1 | 1 | 1 | 1 | 1 |
| 0 | 0 | 0 | 0 | 0 | 1 | 1 | 1 | 1 | 1 |
| 0 | 0 | 0 | 0 | 0 | 1 | 1 | 1 | 1 | 1 |
| 0 | 0 | 0 | 0 | 0 | 1 | 1 | 1 | 1 | 1 |

[illegible]

[illegible]

[illegible]



[illegible]

[illegible]

[illegible]

|   |   |   |   |
|---|---|---|---|
| 1 | 1 | 1 | 1 |
| 1 | 1 | 1 | 1 |
| 1 | 1 | 1 | 1 |
| 1 | 1 | 1 | 1 |
| 0 | 1 | 1 | 1 |
| 1 | 1 | 1 | 1 |
| 1 | 1 | 1 | 1 |
| 1 | 1 | 1 | 1 |
| 1 | 1 | 1 | 1 |
| 1 | 1 | 1 | 1 |
| 1 | 1 | 1 | 1 |
| 1 | 1 | 1 | 1 |
| 1 | 1 | 1 | 1 |
| 1 | 1 | 1 | 1 |
| 1 | 1 | 1 | 1 |
| 1 | 1 | 1 | 1 |
| 1 | 1 | 1 | 1 |
| 1 | 1 | 1 | 1 |
| 1 | 1 | 1 | 1 |
| 1 | 1 | 1 | 1 |
| 1 | 1 | 1 | 1 |
| 1 | 1 | 1 | 1 |
| 0 | 0 | 1 | 1 |
| 1 | 1 | 1 | 1 |
| 1 | 1 | 1 | 1 |
| 1 | 1 | 1 | 1 |
| 0 | 1 | 1 | 1 |
| 1 | 1 | 1 | 1 |
